# Supplementary material
Source: PubMed Central journal article supplement (PMC4319434)
Supplement: JCI77632sd.pdf [file JCI77632sd.pdf]

1 **SUPPLEMENTARY FIGURE LEGENDS**

2

3 **Supplementary Figure 1**

4 **(A) Histological changes in kidney tissues from control or cisplatin-mice treated with saline,**  
5 **AICAR or ALCAR at 4 days. Scale bar (black) 50  $\mu$ m. (B) Effect of ALCAR treatment on the**  
6 **number of casts and necrotic tubuli in mice with cisplatin-induced AKI at 4 days. HPF, high-**  
7 **power field. \*\*P<0.01 using ANOVA corrected with Bonferroni coefficient (n=8 mice per**  
8 **group). Data are expressed as Box-plot diagram.**

9

10 **Supplementary Figure 2**

11 SIRT3 protein (green) colocalizes with the mitochondrial protein VDAC (red) in renal tissue of  
12 control mice. Scale bar (white) 20 $\mu$ m.

13

14 **Supplementary Figure 3**

15 Representative images of SIRT3 protein staining (green) in mouse proximal tubuli of control and  
16 cisplatin mice given saline or ALCAR at 4 days. Scale bar (white) 10 $\mu$ m.

17

18 **Supplementary Figure 4**

19 Renal function in WT and *Sirt3*<sup>-/-</sup> mice with cisplatin-induced AKI at 2 and 4 days. \*\*\*P<0.001 by  
20 unpaired T test (n=8 mice per group). **Data are expressed as Box-plot diagram.**

21

22 **Supplementary Figure 5**

23 Survival curves of WT and *Sirt3*<sup>-/-</sup> mice with glycerol-induced AKI. \*\*P<0.01 using Log rank test.  
24 (n= 8 WT mice+glycerol; n= 7 *Sirt3*<sup>-/-</sup> mice+glycerol). Values are mean  $\pm$  SEM.

25

26 **Supplementary Figure 6**

1 (A) Quantification of fluorescence signal of SIRT3 protein (red) and mRNA expression in control  
2 or transfected RPTEC with GFP-tagged (green) SIRT3 plasmid (pSIRT3) at 48 h. \*\*\*P<0.001 by  
3 unpaired T test. Values are mean  $\pm$  SEM (n=3 experiments). Scale bar (white) 10 $\mu$ m. (B)  
4 Quantification of Opa1 immunofluorescence signal (Pixel<sup>2</sup>/cell) in control and cisplatin-injured  
5 RPTEC untransfected or transfected with pSIRT3. \*P<0.05 and \*\*P<0.01 using ANOVA corrected  
6 with Bonferroni coefficient. Values are mean  $\pm$  SEM (n=3 experiments).

7

8

**Supplementary Table 1**

Renal function in control and cisplatin-mice treated with saline, AICAR or ALCAR at 4 days

---

|                    | Serum Creatinine<br>(mg/dl) |
|--------------------|-----------------------------|
| <b>Control</b>     | 0.14±0.01                   |
| <b>Cispl</b>       | 0.75±0.18*                  |
| <b>Cispl+AICAR</b> | 0.24±0.07°                  |
| <b>Cispl+ALCAR</b> | 0.26±0.02°                  |

---

Data are mean ± SEM

\* P<0.05 vs Control

° P<0.05 vs Cispl

(n=3 mice per group) ANOVA corrected with Bonferroni coefficient

**Supplementary Table 2**

Morphometrical analysis of mitochondrial density and mean volume in renal tissue of control and cisplatin-mice treated with saline, AICAR or ALCAR at 4 days

|                    | Mitochondrial density<br>(n/ $\mu\text{m}^3$ ) | Mean mitochondrial<br>volume ( $\mu\text{m}^3$ ) |
|--------------------|------------------------------------------------|--------------------------------------------------|
| <b>Control</b>     | 0.61 $\pm$ 0.05                                | 0.70 $\pm$ 0.07                                  |
| <b>Cispl</b>       | 0.44 $\pm$ 0.02*                               | 0.43 $\pm$ 0.03*                                 |
| <b>Cispl+AICAR</b> | 0.77 $\pm$ 0.04* °                             | 0.54 $\pm$ 0.03*                                 |
| <b>Cispl+ALCAR</b> | 0.59 $\pm$ 0.03°                               | 0.52 $\pm$ 0.03*                                 |

Data are mean  $\pm$  SEM

\* P<0.001 vs Control

° P<0.001 vs Cispl

(n=6 mice per group) ANOVA corrected with Bonferroni coefficient

A

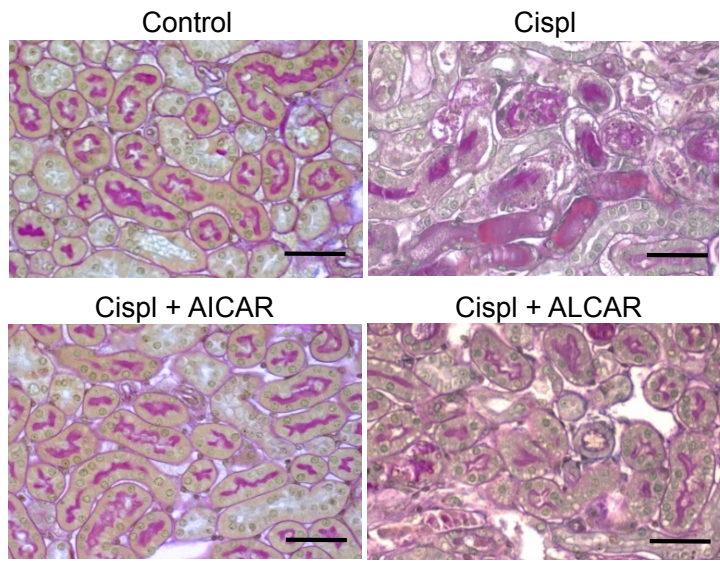

B

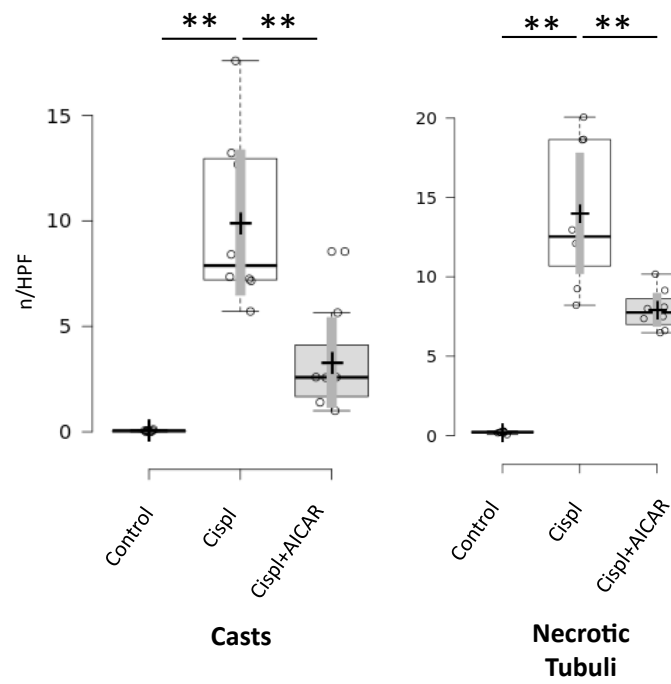

Supplementary Figure 1

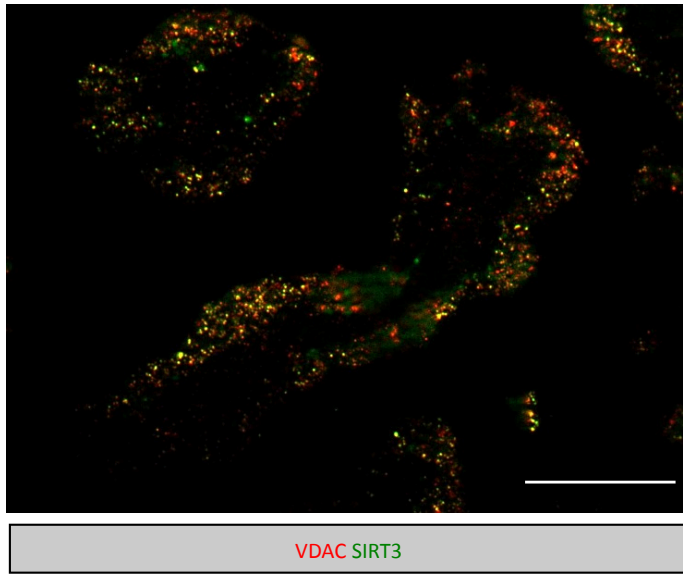

Supplementary Figure 2

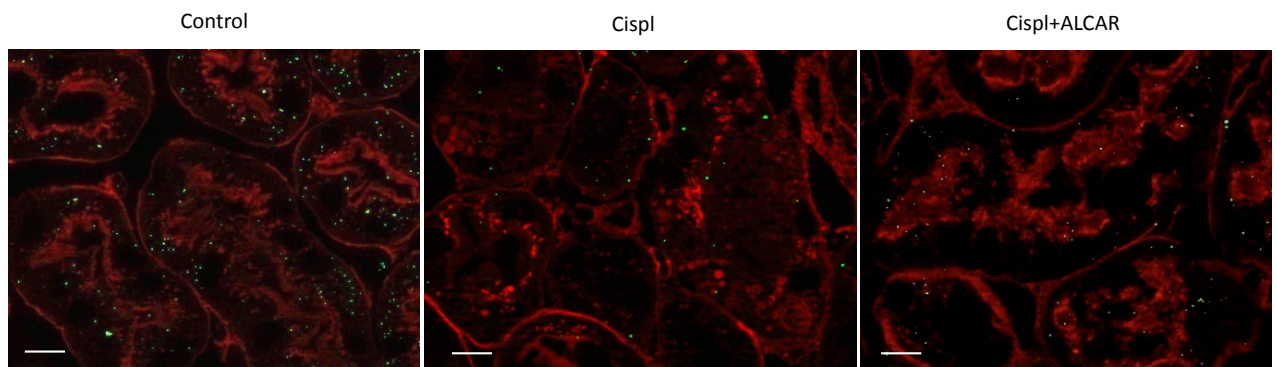

Supplementary Figure 3

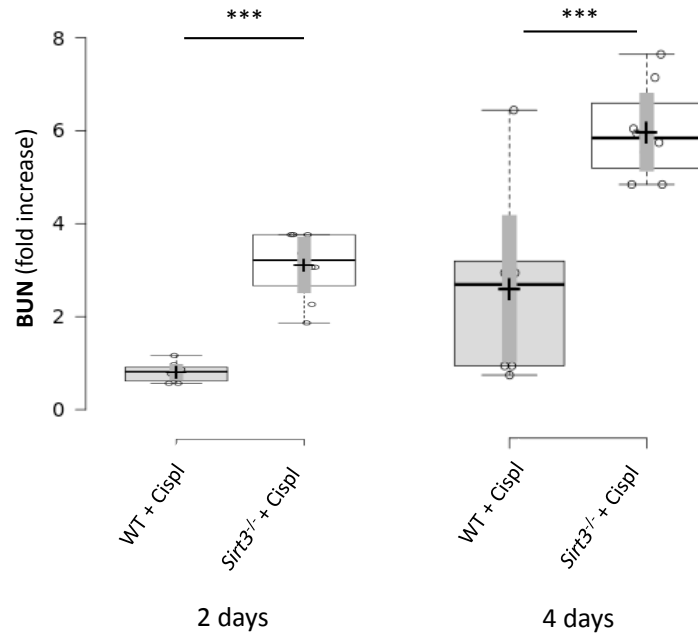

Supplementary Figure 4



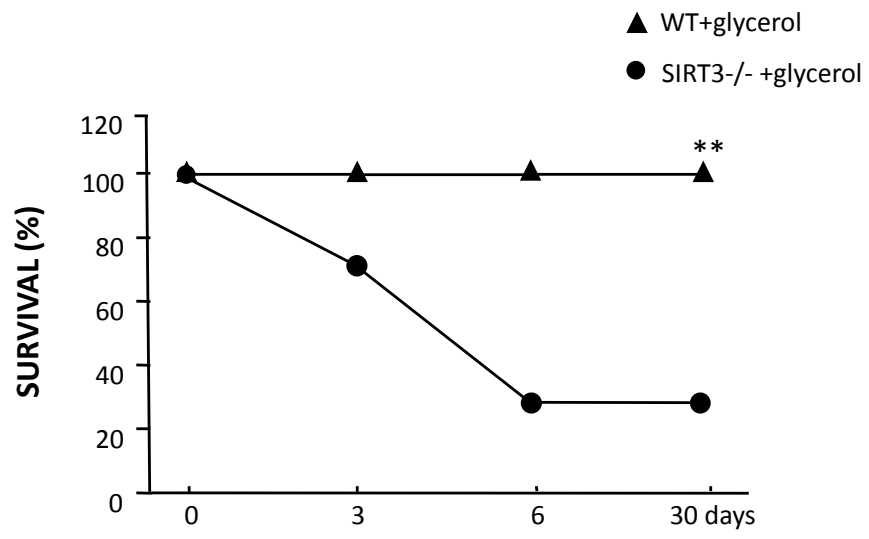

Supplementary Figure 5

A

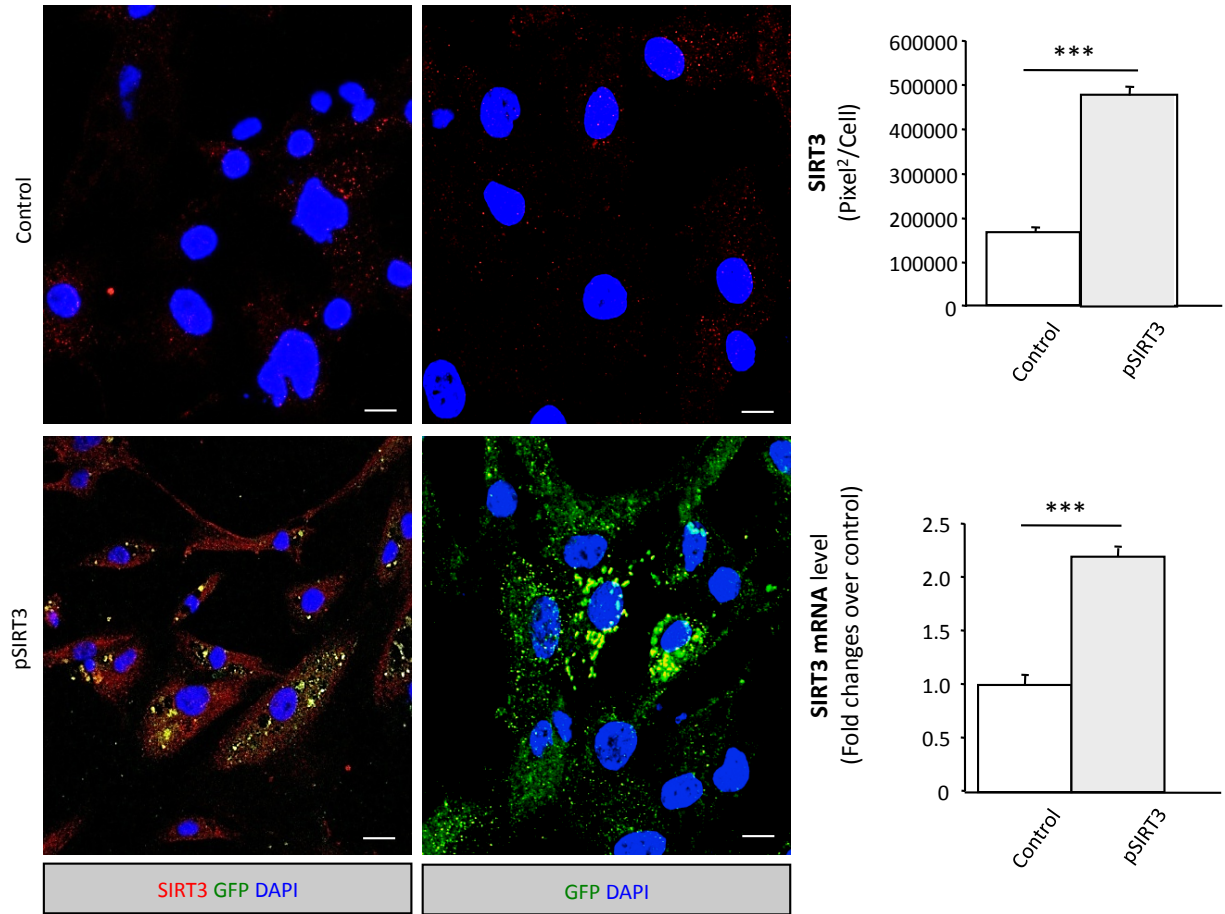

B

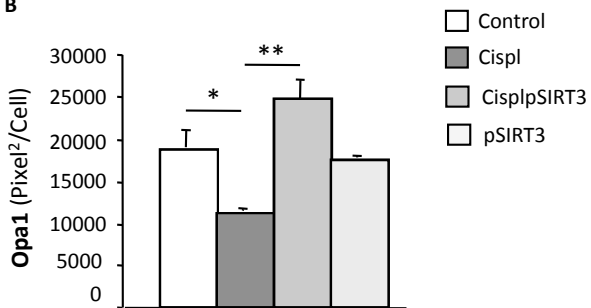

Supplementary Figure 6
